# Supplementary material for: Exploring the Limits of the Geometric Copolymerization Model
Source: MDPI journal article supplement (doi:10.3390/polym9030101), 2017-03-13
Supplement: s1 [file s1]

# Supplementary Materials: Exploring the Limits of the Geometric Copolymerization Model

1 Martin S. Engler, Kerstin Scheubert, Ulrich S. Schubert and Sebastian Böcker

## 2 1. Monte-Carlo simulation parameters

**Table S1.** Initial concentrations (in mol·L<sup>-1</sup>) and reaction rates of the Monte-Carlo simulations of living polymerizations.

| Dataset                | Initial concentration |                  |                  | Reaction rates  |                 |                 |                 |
|------------------------|-----------------------|------------------|------------------|-----------------|-----------------|-----------------|-----------------|
|                        | [I] <sub>0</sub>      | [A] <sub>0</sub> | [B] <sub>0</sub> | k <sub>AA</sub> | k <sub>AB</sub> | k <sub>BA</sub> | k <sub>BB</sub> |
| $DP_n = 3, r_A = 0.01$ | 1                     | 1                | 2                | 0.01            | 1               | 0.01            | 1               |
| $DP_n = 3, r_A = 1$    | 1                     | 1                | 1                | 1               | 1               | 1               | 1               |
| $DP_n = 3, r_A = 2$    | 1                     | 1                | 2                | 2               | 1               | 2               | 1               |
| $DP_n = 25, r_A = 2$   | 1                     | 10               | 15               | 2               | 1               | 2               | 1               |
| $DP_n = 45, r_A = 2$   | 1                     | 20               | 25               | 2               | 1               | 2               | 1               |

## 3 2. Independence of the parameter order

4 In the following, let the matrix  $M$  of size  $n \times m$  be a copolymer fingerprint, in which entry  $M_{a,b}$   
 5 gives the relative abundance of a copolymer with  $a$  monomers of type A and  $b$  monomers of type  
 6 B. Let  $T$  be the number of synthesis steps. Let  $p_M$  be the probability of encountering a monomer,  
 7 and let  $p_A$  be a vector of size  $T$  with the probabilities that the encountered monomer is an A for each  
 8 synthesis step  $1 \leq t \leq T$ . Let  $p_B(t)$ , the probability of encountering a monomer B be defined as  
 9  $p_B(t) = 1 - p_A(t)$ .

10 Let  $\pi(x)$  be a permutation of some vector  $x$ . Let  $M^\pi$  be the resulting fingerprint of our model  
 11 with input  $\pi(p_A)$ . We define a model to be *order-independent* if the resulting fingerprints are the same  
 12 for any permutation of  $p_A$ , that is  $M = M^\pi$  for any  $\pi$ .

13 In our previous paper, we introduced a copolymerization model with several variants similar  
 14 to a discrete Markov-chain, that append monomers in each synthesis (time) step with Bernoulli or  
 15 geometrically distributed probability [1]. Here, we will investigate if they are order-independent.

16 We do a simple experiment to investigate the order-independence of our models. For both  
 17 models, we compute a fingerprint with parameters  $p_A = [0, 0.1, 0.2, 0.4, 0.5]$ ,  $p_M = 0.5$  and varying  
 18 reactivity ratios. Subsequently, for all permutations  $\pi(p_A)$  we compute a fingerprint and calculate  
 19 the normalized root mean square error (NRMSE) in comparison to the first fingerprint (Fig. S1).

20 The distance between two fingerprints increases with the distance between  $p_A$  and  $\pi(p_A)$ .  
 21 However, as the reactivity ratios approach one, the distance between the fingerprints decreases. In  
 22 this experimental instance, we see that the models are order-independent if the reactivity ratios are  
 23 one.

24 To verify that the models are order-independent for reactivity ratios of one, we investigate the  
 25 model variants without reactivity parameters. As previously described by Engler *et al.* [1], for the  
 26 Bernoulli model without reactivity parameters, an entry  $M_{a,b}$  in the fingerprint  $M$  at synthesis step  $t$   
 27 for  $a > 0$ ,  $b > 0$ , and  $1 \leq t \leq T$  is given by:

$$\begin{aligned}
 M_{a,b}(t) = & p_M \cdot p_A(t) \cdot M_{a-1,b}(t-1) \\
 & + p_M \cdot p_B(t) \cdot M_{a,b-1}(t-1) \\
 & + (1 - p_M) \cdot M_{a,b}(t-1)
 \end{aligned} \tag{1}$$

28 For the Geometric model without reactivity parameters, we first have to derive a closed form for  
 29  $M_{a,b}$ . Let  $p_G(k)$  be the geometrically distributed probability of adding  $k$  monomers in one synthesis

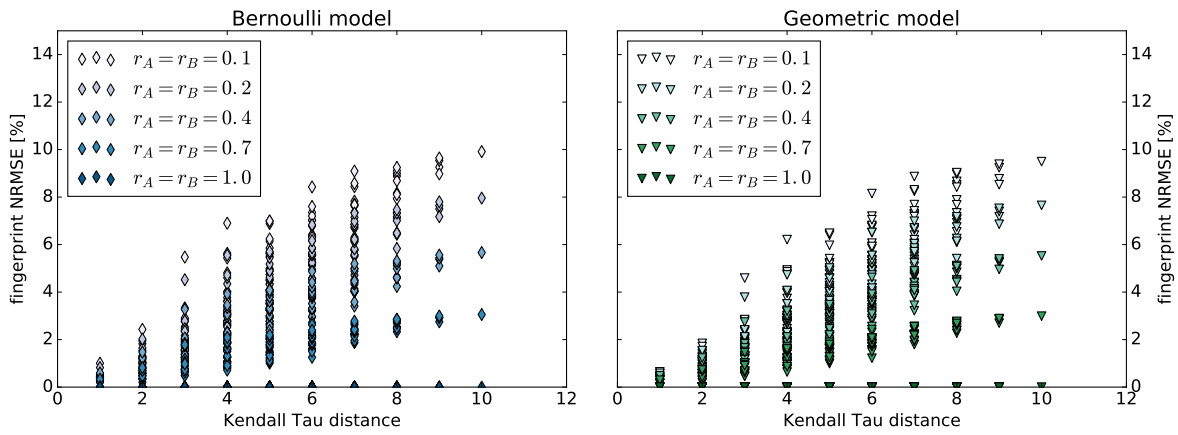

**Figure S1.** Normalized root mean square errors of the fingerprints for all permutations  $\pi(p_A)$  compared to the fingerprint of the original  $p_A$  computed with the Bernoulli (left) and Geometric model (right). The Kendall Tau distance is the number of pairwise disagreements between two permutations.

30 step. As previously described by Engler *et al.* [1], the probability of adding  $i$  monomers A and  $j$   
 31 monomers B to a copolymer chain is given for  $a > 0$ ,  $b > 0$ , and  $1 \leq t \leq T$  as:

$$P(M_{a,b} \rightarrow M_{a+i,b+j}|t) = \binom{i+j}{j} \cdot P_G(i+j) \cdot p_A(t)^i \cdot p_B(t)^j \quad (2)$$

32 We define  $f_{i,j}^{a,b}$  as:

$$f_{i,j}^{a,b} = \binom{a+b-i-j}{b-j} \cdot P_G(a+b-i-j) \quad (3)$$

33 Now we apply Eq. 2 and Eq. 3 to find a closed form expression for a fingerprint entry  $M_{a,b}$ :

$$M_{a,b}(t) = \sum_{i=0}^a \sum_{j=0}^b f_{i,j}^{a,b} \cdot p_A(t)^{a-i} \cdot p_B(t)^{b-j} \cdot M_{i,j}(t-1) \quad (4)$$

34 Now that we are given the equations for computing an entry in the fingerprint at a specific  
 35 synthesis step for both models without reactivity parameters, we can show that an inversion of  
 36 neighboring values in  $p_A$  does not change the resulting fingerprint.

37 **Lemma 1.** Given the Bernoulli model without reactivity parameters and a permutation  $\pi(p_A)$  that swaps  
 38  $p_A(t)$  with  $p_A(t-1)$ , then  $M_{a,b}(t) = M_{a,b}^\pi(t)$  holds for all  $a > 0$ ,  $b > 0$ , and  $2 \leq t \leq T$ .

39 **Proof.** Inserting  $M_{a,b}(t-1)$  into the recursive equation 1 yields:

$$\begin{aligned} M_{a,b}(t) = & p_M^2 \cdot p_A(t) \cdot p_A(t-1) \cdot M_{a-2,b}(t-2) \\ & + p_M^2 \cdot p_B(t) \cdot p_B(t-1) \cdot M_{a,b-2}(t-2) \\ & + p_M^2 \cdot p_A(t) \cdot p_B(t-1) \cdot M_{a-1,b-1}(t-2) \\ & + p_M^2 \cdot p_B(t) \cdot p_A(t-1) \cdot M_{a-1,b-1}(t-2) \\ & + p_M \cdot (1-p_M) \cdot p_A(t) \cdot M_{a-1,b}(t-2) \\ & + p_M \cdot (1-p_M) \cdot p_A(t-1) \cdot M_{a-1,b}(t-2) \\ & + p_M \cdot (1-p_M) \cdot p_B(t) \cdot M_{a,b-1}(t-2) \\ & + p_M \cdot (1-p_M) \cdot p_B(t-1) \cdot M_{a,b-1}(t-2) \\ & + (1-p_M)^2 \cdot M_{a,b}(t-2) \end{aligned} \quad (5)$$

40 We replace  $p_A(t-1)$  with  $\pi(p_A)(t)$ ,  $p_A(t)$  with  $\pi(p_A)(t-1)$ ,  $p_B(t-1)$  with  $\pi(p_B)(t)$ , and  $p_B(t)$   
41 with  $\pi(p_B)(t-1)$ :

$$\begin{aligned}
M_{a,b}(t) = & p_M^2 \cdot \pi(p_A)(t) \cdot \pi(p_A)(t-1) \cdot M_{a-2,b}(t-2) \\
& + p_M^2 \cdot \pi(p_B)(t) \cdot \pi(p_B)(t-1) \cdot M_{a,b-2}(t-2) \\
& + p_M^2 \cdot \pi(p_A)(t) \cdot \pi(p_B)(t-1) \cdot M_{a-1,b-1}(t-2) \\
& + p_M^2 \cdot \pi(p_B)(t) \cdot \pi(p_A)(t-1) \cdot M_{a-1,b-1}(t-2) \\
& + p_M \cdot (1-p_M) \cdot \pi(p_A)(t) \cdot M_{a-1,b}(t-2) \\
& + p_M \cdot (1-p_M) \cdot \pi(p_A)(t-1) \cdot M_{a-1,b}(t-2) \\
& + p_M \cdot (1-p_M) \cdot \pi(p_B)(t) \cdot M_{a,b-1}(t-2) \\
& + p_M \cdot (1-p_M) \cdot \pi(p_B)(t-1) \cdot M_{a,b-1}(t-2) \\
& + (1-p_M)^2 \cdot M_{a,b}(t-2)
\end{aligned} \tag{6}$$

42 We simplify the equation to:

$$\begin{aligned}
M_{a,b}(t) = & p_M \cdot \pi(p_A)(t) \cdot M_{a-1,b}(t-1) \\
& + p_M \cdot \pi(p_B)(t) \cdot M_{a,b-1}(t-1) \\
& + (1-p_M) \cdot M_{a,b}(t-1)
\end{aligned} \tag{7}$$

43 Which can be further simplified to:

$$M_{a,b}(t) = M_{a,b}^\pi(t) \tag{8}$$

44 □

45 **Lemma 2.** Given the Geometric model without reactivity parameters and a permutation  $\pi(p_A)$  that swaps  
46  $p_A(t)$  with  $p_A(t-1)$ , then  $M_{a,b}(t) = M_{a,b}^\pi(t)$  holds for all  $a > 0$ ,  $b > 0$ , and  $2 \leq t \leq T$ .

47 **Proof Sketch.** Inserting  $M_{i,j}(t-1)$  into the recursive equation 4 yields:

$$\begin{aligned}
M_{a,b}(t) = & \sum_{i=0}^a \sum_{j=0}^b f_{i,j}^{a,b} \cdot p_A(t)^{a-i} \cdot p_B(t)^{b-j} \\
& \cdot \sum_{k=0}^i \sum_{l=0}^j f_{k,l}^{i,j} p_A(t-1)^{i-k} \cdot p_B(t-1)^{j-l} \cdot M_{k,l}(t-2)
\end{aligned} \tag{9}$$

48 Writing the terms of the sums explicitly yields a large equation of the following form:

$$\begin{aligned}
M_{a,b}(t) = & f_{0,0}^{a,b} p_A(t)^a p_B(t)^b \\
& + f_{0,1}^{a,b} p_A(t)^a p_B(t)^{b-1} \left( f_{0,0}^{0,1} M_{0,0}(t-2) + f_{0,1}^{0,1} p_B(t) M_{0,1}(t-2) \right) \\
& + f_{1,0}^{a,b} p_A(t)^{a-1} p_B(t)^b \left( f_{0,0}^{1,0} M_{0,0}(t-2) + f_{1,0}^{1,0} p_A(t) M_{1,0}(t-2) \right) \\
& + f_{1,1}^{a,b} p_A(t)^{a-1} p_B(t)^{b-1} \left( f_{0,0}^{1,1} M_{0,0}(t-2) + f_{1,0}^{1,1} p_A(t) M_{1,0}(t-2) \right. \\
& \quad \left. + f_{0,1}^{1,1} p_B(t) M_{0,1}(t-2) + f_{1,1}^{1,1} p_A(t) p_B(t) M_{1,1}(t-2) \right) \\
& + \dots \\
& + f_{a,b}^{a,b} \left( f_{0,0}^{a,b} M_{0,0}(t-2) + \dots + f_{a,b}^{a,b} p_A(t-1)^a p_B(t-1)^b M_{a,b}(t-2) \right)
\end{aligned} \tag{10}$$

49 If we now expand this equation, we see that for every term of the form  $p_A(t)^\alpha p_B(t)^\beta p_A(t-1)^\gamma p_B(t-1)^\delta$   
50 there is a corresponding term  $p_A(t)^\gamma p_B(t)^\delta p_A(t-1)^\alpha p_B(t)^\beta$  and we change equation 9  
51 to:

$$M_{a,b}(t) = \sum_{i=0}^a \sum_{j=0}^b f_{i,j}^{a,b} \cdot p_A(t-1)^{a-i} \cdot p_B(t-1)^{b-j} \cdot \sum_{k=0}^i \sum_{l=0}^j f_{k,l}^{i,j} p_A(t)^{i-k} \cdot p_B(t)^{j-l} \cdot M_{k,l}(t-2) \quad (11)$$

52 We replace  $p_A(t-1)$  with  $\pi(p_A)(t)$ ,  $p_A(t)$  with  $\pi(p_A)(t-1)$ ,  $p_B(t-1)$  with  $\pi(p_B)(t)$ , and  $p_B(t)$   
53 with  $\pi(p_B)(t-1)$ :

$$M_{a,b}(t) = \sum_{i=0}^a \sum_{j=0}^b f_{i,j}^{a,b} \cdot \pi(p_A)(t)^{a-i} \cdot \pi(p_B)(t)^{b-j} \cdot \sum_{k=0}^i \sum_{l=0}^j f_{k,l}^{i,j} \pi(p_A)(t-1)^{i-k} \cdot \pi(p_B)(t-1)^{j-l} \cdot M_{k,l}(t-2) \quad (12)$$

54 We simplify the equation to:

$$M_{a,b}(t) = M_{a,b}^{\pi}(t) \quad (13)$$

55 □

56 For the models without reactivity parameters, we know from Lemma 1 and 2 that no inversion  
57 of neighboring values in  $p_A$  changes the resulting fingerprint. Any permutation of a vector can be  
58 constructed by a sequence of inversions of neighboring elements. Therefore, for the Bernoulli and  
59 Geometric model without reactivity parameters, all permutations of a probability vector  $p_A$  have the  
60 same resulting fingerprint.

### 61 3. Parameter optimization

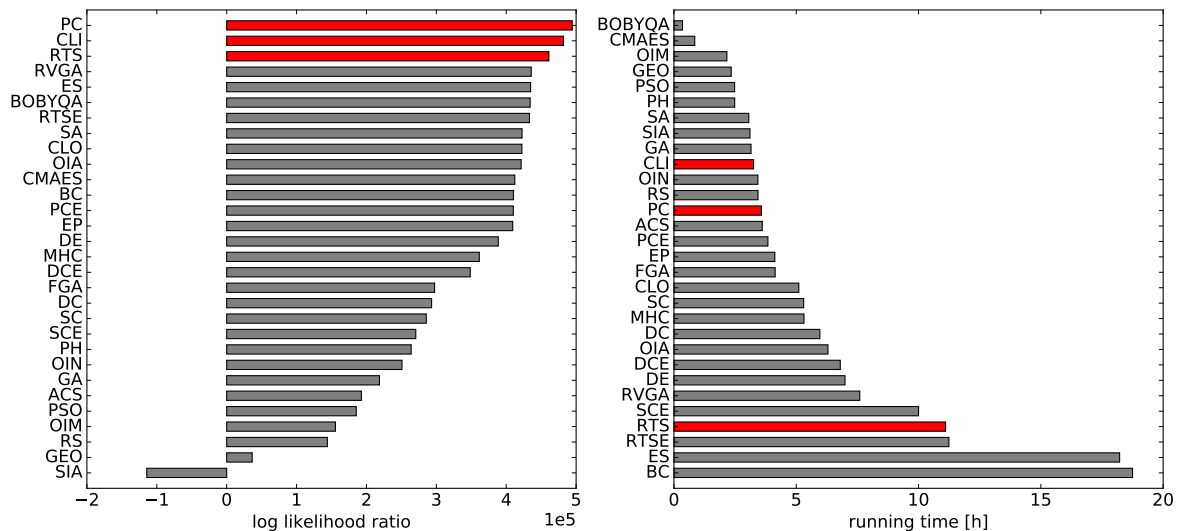

**Figure S2.** Left: Log likelihood ratio of all optimization algorithms using the direct method on the  $DP_n = 3, r_A = 2.0$  instance without noise. The top three algorithms are marked in red. Right: Running times of the algorithms.

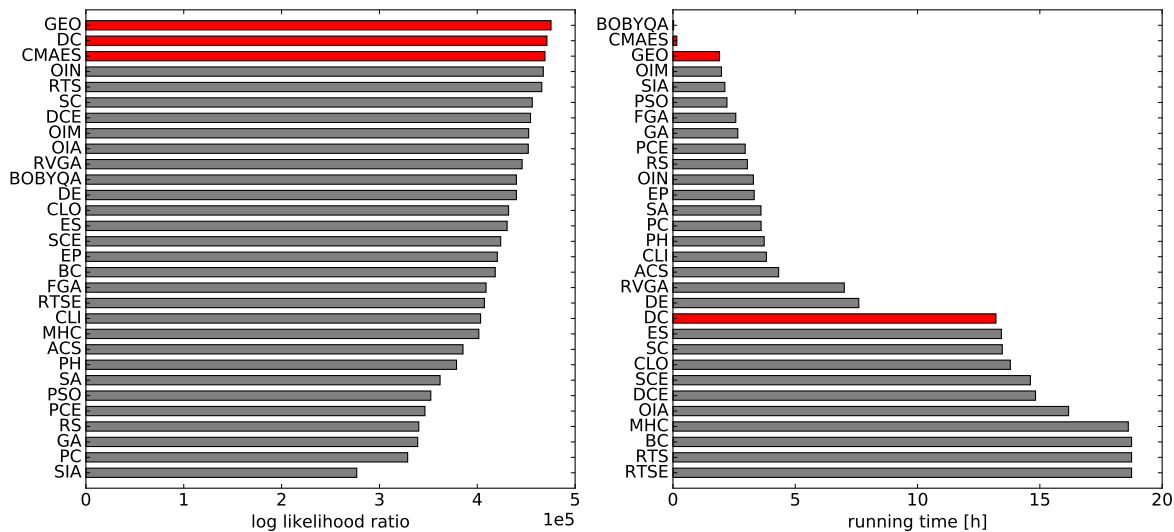

**Figure S3.** Left: Log likelihood ratio of all optimization algorithms using the spline method on the  $DP_n = 3, r_A = 2.0$  instance without noise. The top three algorithms are marked in red. Right: Running times of the algorithms.

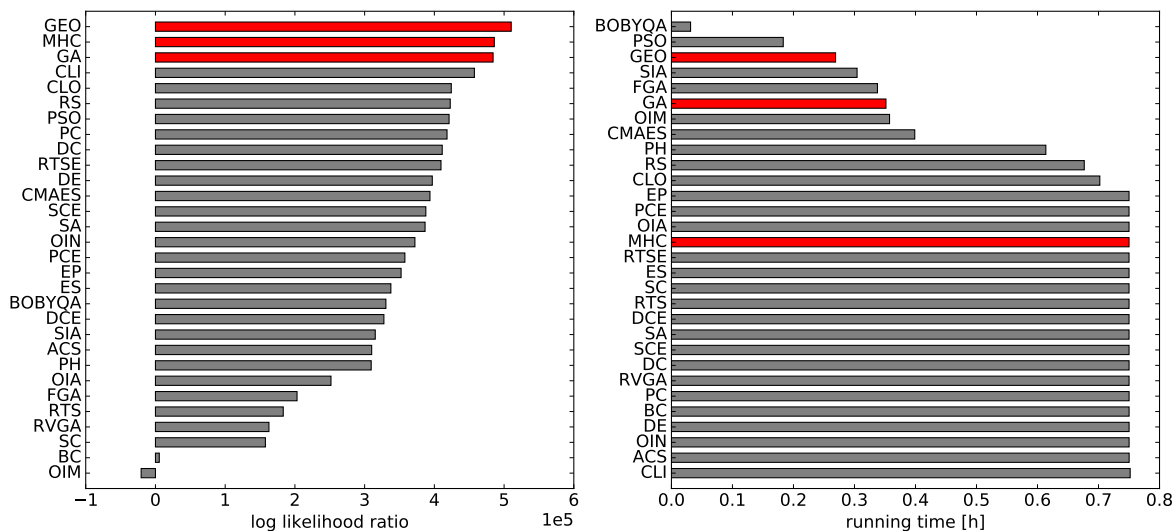

**Figure S4.** Left: Log likelihood ratio of all optimization algorithms using the ODE method on the  $DP_n = 3, r_A = 2.0$  instance without noise. The top three algorithms are marked in red. Right: Running times of the algorithms.

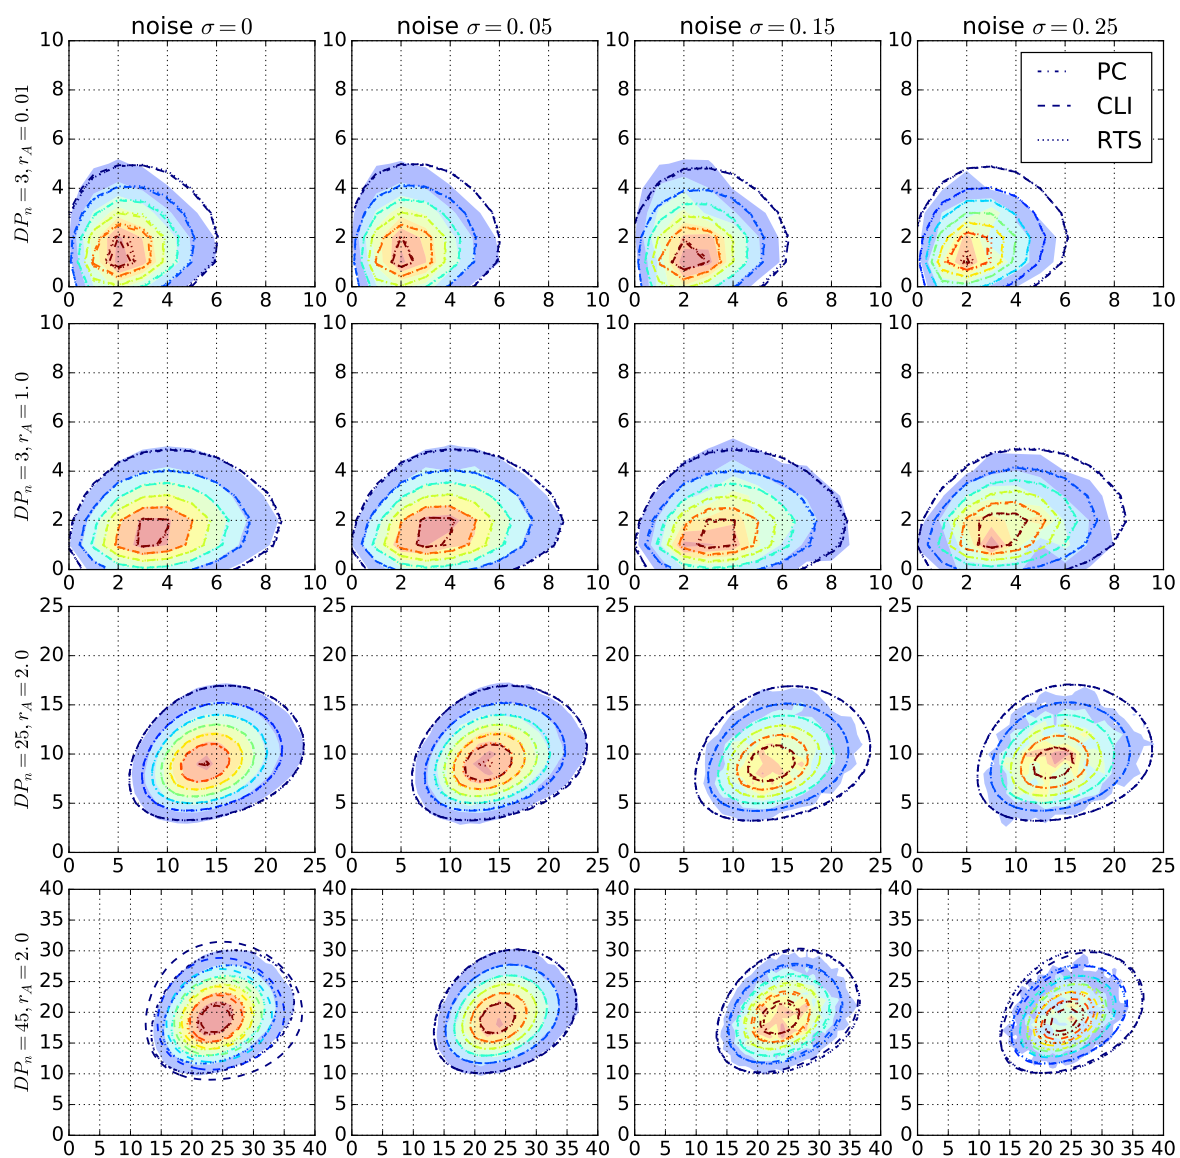

**Figure S5.** Filled contours: Fingerprints of the datasets  $DP_n = 3, r_A = 0.01$ ,  $DP_n = 3, r_A = 1.0$ ,  $DP_n = 25, r_A = 2.0$ , and  $DP_n = 45, r_A = 2.0$ , (top to bottom) with increasing noise (left to right). Contours: Fingerprints computed by the model using the direct method.

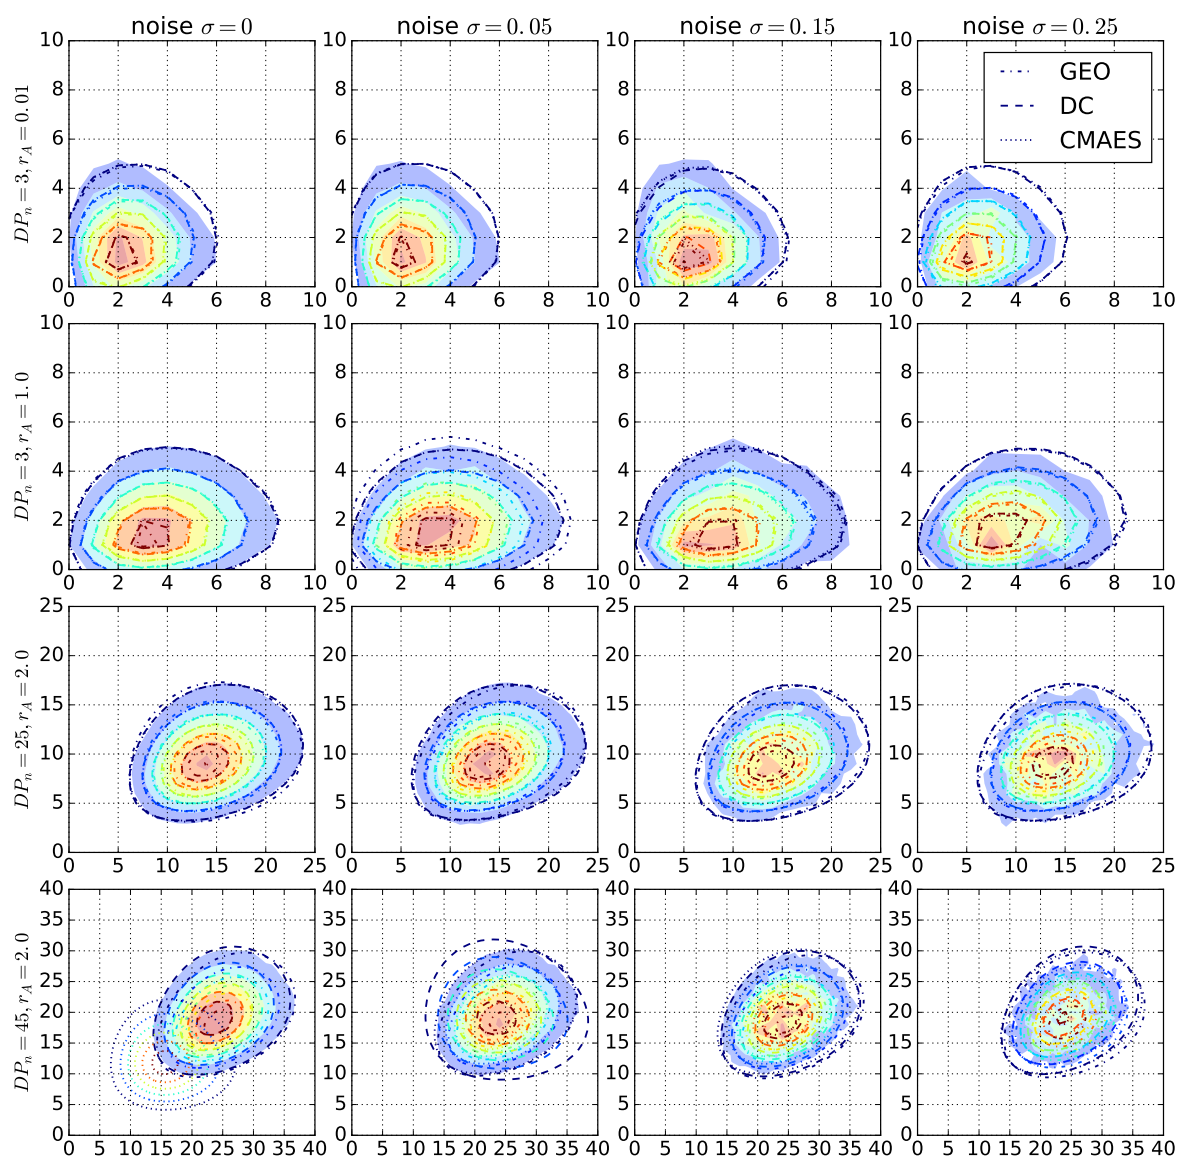

**Figure S6.** Filled contours: Fingerprints of the datasets  $DP_n = 3, r_A = 0.01$ ,  $DP_n = 3, r_A = 1.0$ ,  $DP_n = 25, r_A = 2.0$ , and  $DP_n = 45, r_A = 2.0$  (top to bottom) with increasing noise (left to right). Contours: Fingerprints computed by the model using the spline method.

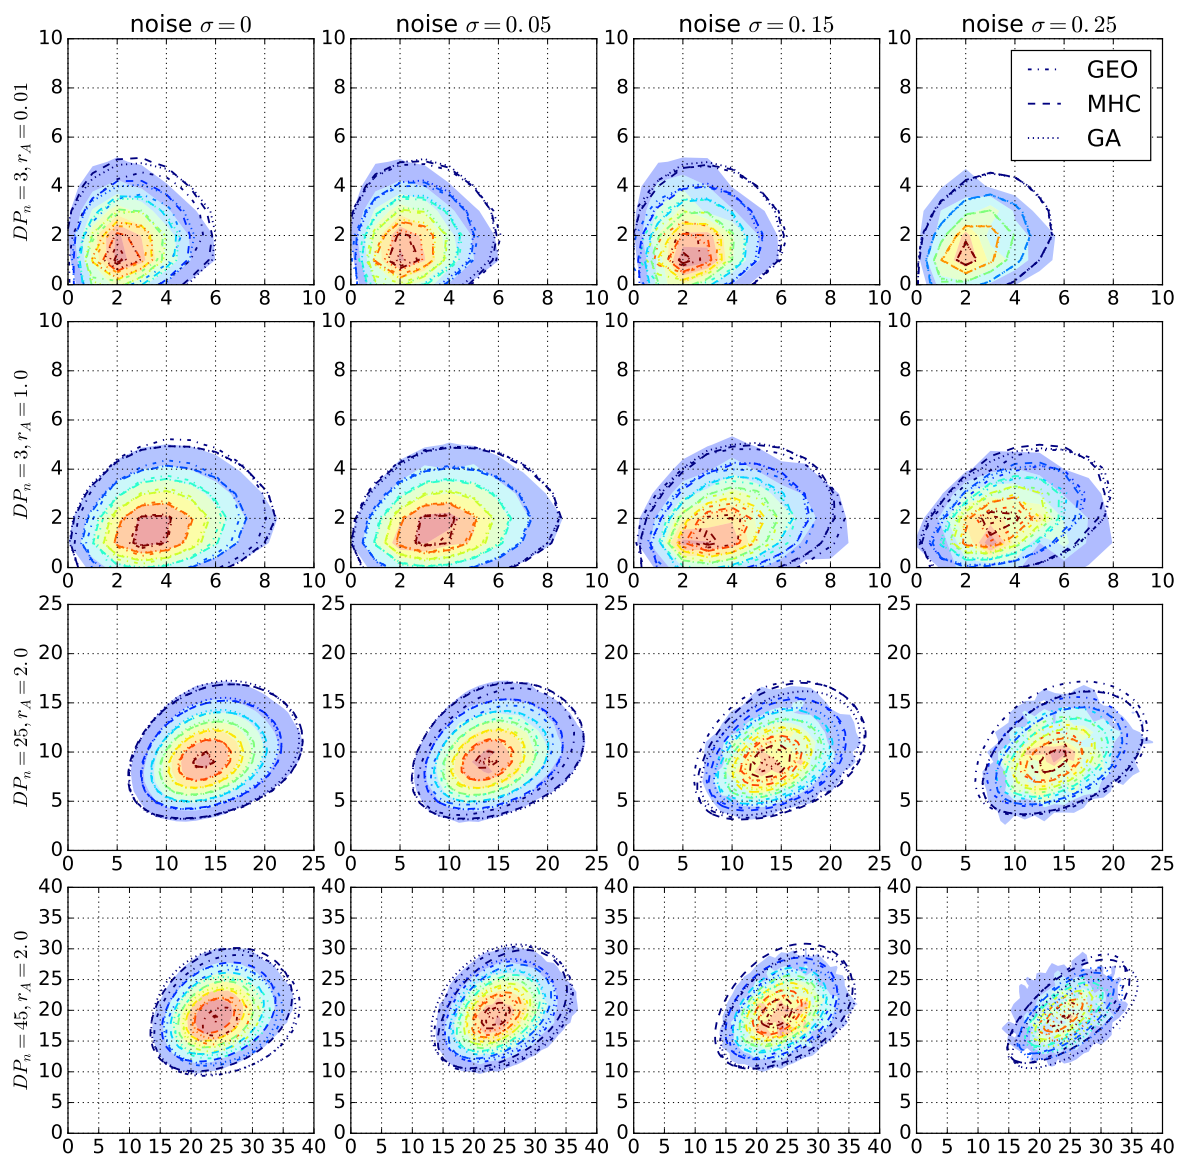

**Figure S7.** Filled contours: Fingerprints of the datasets  $DP_n = 3, r_A = 0.01$ ,  $DP_n = 3, r_A = 1.0$ ,  $DP_n = 25, r_A = 2.0$ , and  $DP_n = 45, r_A = 2.0$ , (top to bottom) with increasing noise (left to right). Contours: Fingerprints computed by the model using the ODE method.



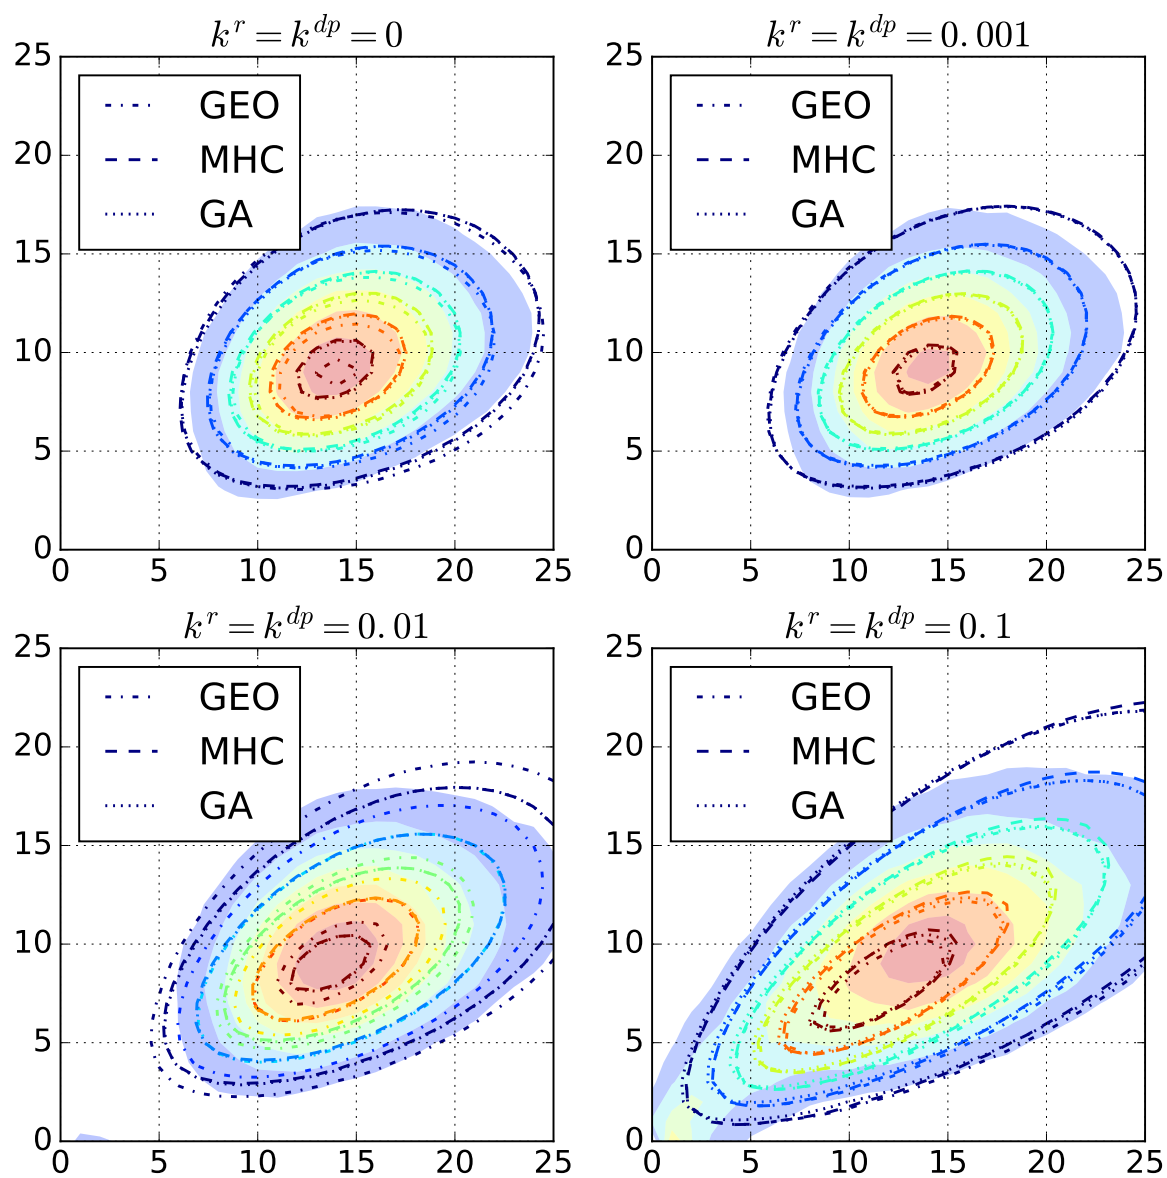

**Figure S8.** Filled contours: Fingerprints of the controlled radical copolymerizations with increasing recombination  $k^r$  and disproportionation rates  $k^{dp}$ . Contours: Fingerprints computed by the model using the ODE method.

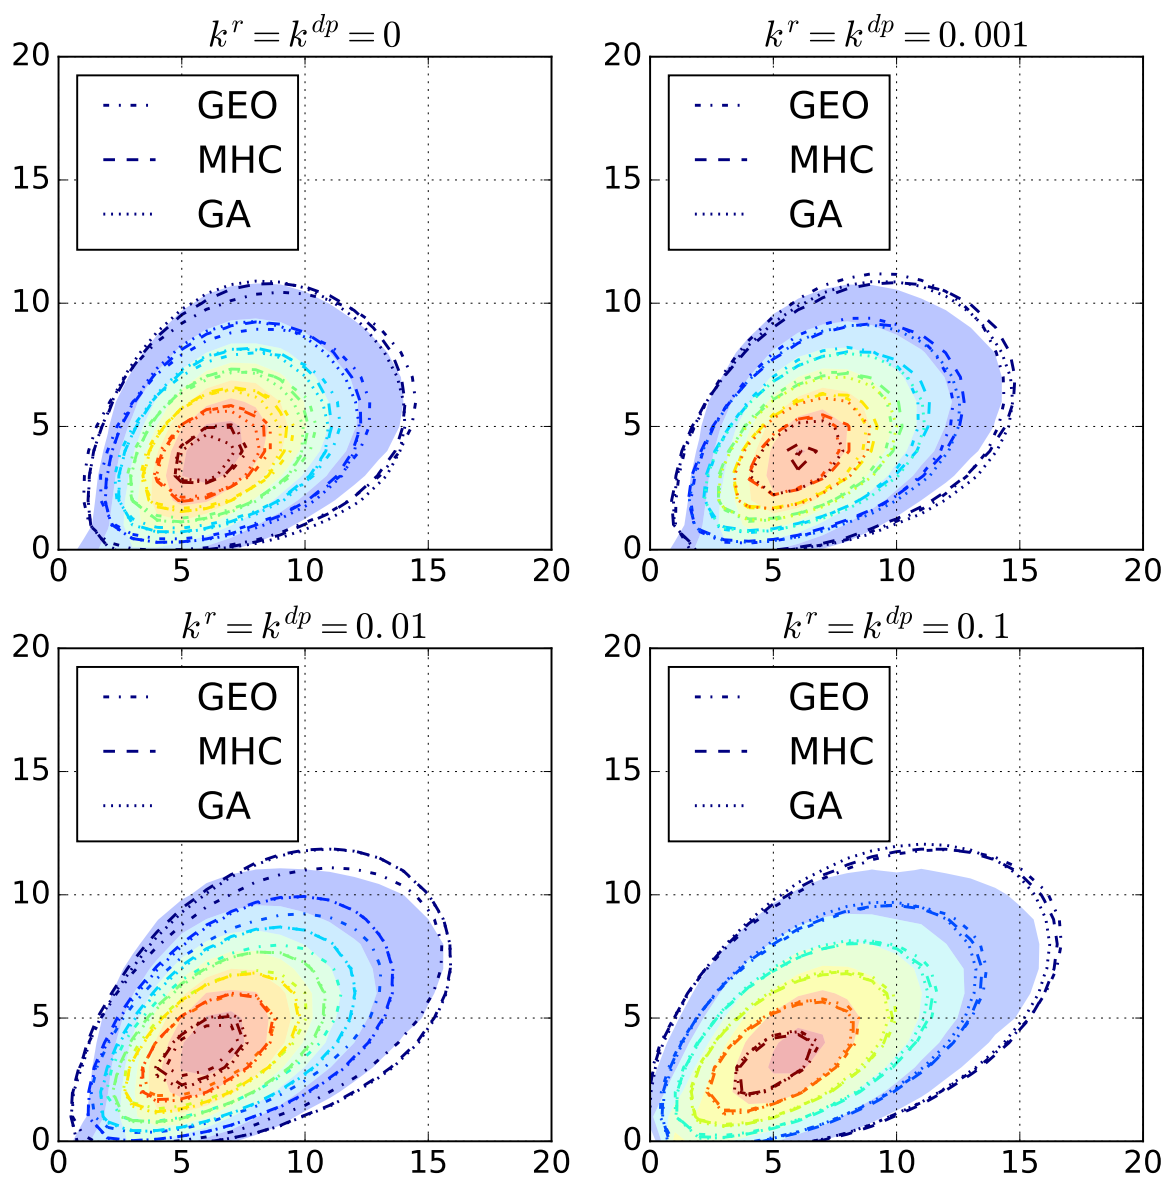

**Figure S9.** Filled contours: Fingerprints of the free radical copolymerizations with increasing recombination  $k^r$  and disproportionation rates  $k^{dp}$ . Contours: Fingerprints computed by the model using the ODE method.

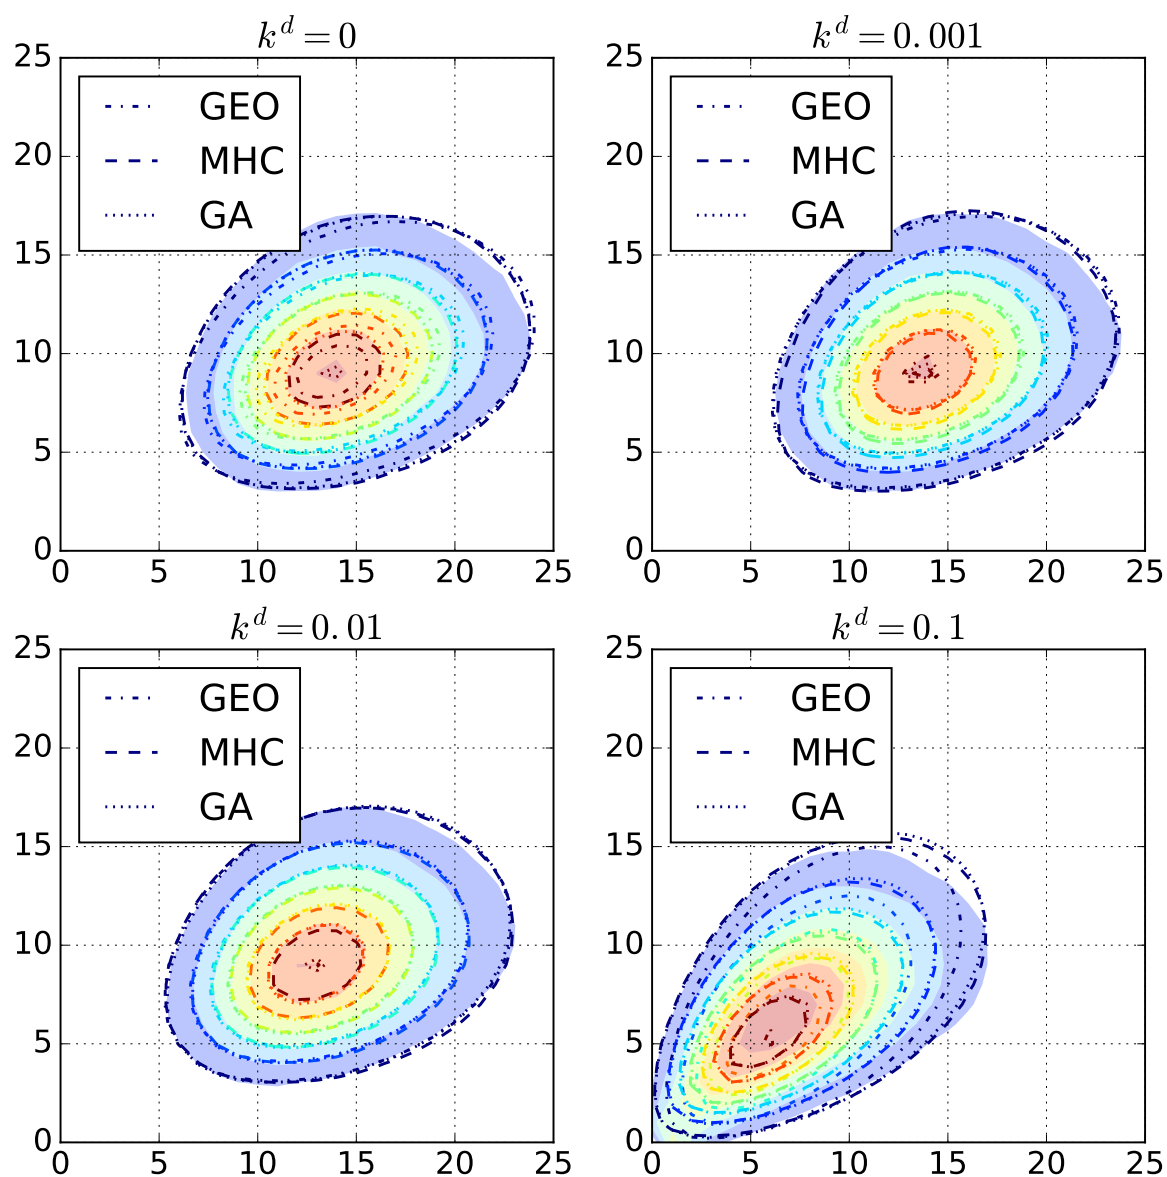

**Figure S10.** Filled contours: Fingerprints of the reversible living copolymerizations with increasing depropagation rates  $k^d$ . Contours: Fingerprints computed by the model using the ODE method.

**62 Bibliography**

- 63** 1. Engler, M.S.; Scheubert, K.; Schubert, U.S.; Böcker, S. New Statistical Models for Copolymerization.  
**64** *Polymers* **2016**, *8*, 240.
